# Supplementary material for: Ring-fused 2-pyridones effective against multidrug-resistant Gram-positive pathogens and synergistic with standard-of-care antibiotics
Source: PubMed Central journal article supplement — Proc Natl Acad Sci U S A. 2022 Oct 17;119(43):e2210912119. doi: 10.1073/pnas.2210912119 (PMC9618150; doi:10.1073/pnas.2210912119), 2022-10-17
Supplement: pnas.2210912119.sapp.pdf [file pnas.2210912119.sapp.pdf]

## Supplementary Information for

### Ring-fused 2-pyridones effective against multidrug-resistant Gram-positive pathogens and synergistic with standard-of-care antibiotics

Taylor M. Nye<sup>1,\*</sup>, Hasan Tükenmez<sup>2,3,4,\*</sup>, Pardeep Singh<sup>2,4,\*</sup>, Ana L. Flores-Mireles<sup>5</sup>, Chloe L. P. Obernuefemann<sup>1</sup>, Jerome S. Pinkner<sup>1</sup>, Souvik Sarkar<sup>2,4</sup>, Mari Bonde<sup>2,6</sup>, Anders E.G. Lindgren<sup>2,4</sup>, Karen W. Dodson<sup>1</sup>, Jörgen Johansson<sup>3,4</sup>, Fredrik Almqvist<sup>2,4,†</sup>, Michael G. Caparon<sup>1,†</sup>, & Scott J. Hultgren<sup>1,†</sup>

\* These authors contributed equally.

† Address correspondence to Scott J. Hultgren, Michael G. Caparon, and Fredrik Almqvist  
Email: hultgren@wustl.edu, caparon@wustl.edu, fredrik.almqvist@umu.se

#### This PDF file includes:

Supporting Text  
Figures S1 to S9  
Tables S1 to S5  
SI References

#### Other supplementary materials for this manuscript include the following:

Dataset S1

## Supporting Text

**Cellular toxicity assays.** HeLa 229 cells (CCL-2.1; ATCC) were maintained and passaged at 37°C (5% CO<sub>2</sub>) in RPMI-1640 medium (25 mM HEPES and L-Glutamine) (HyClone) supplemented with 10% fetal bovine serum (FBS) (Sigma). The Neutral Red (NR) cytotoxicity assay was used to study cellular toxicity of PS757. HeLa cells were seeded in 96-well plates and left to adhere overnight. Cells were then treated in triplicate with 10, 25, 50 and 100  $\mu$ M of PS757 dissolved in 100% dimethyl sulfoxide (DMSO) (Sigma) and further diluted in complete media before being added to the test wells. After 48 hours, the cells were washed with Dulbecco's phosphate buffered saline (DPBS) (CaCl<sub>2</sub> and MgCl<sub>2</sub>) and thereafter incubated with media containing neutral red dye (Sigma) for 3 hours. The cells were subsequently washed, the dye was extracted with NR-desorb (1% Glacial acetic acid solution, 50% EtOH, 49% H<sub>2</sub>O), and absorbance was measured at 540 nm. Averages and standard deviations were calculated from three separate experiments performed in triplicate. The results are shown as a percentage of viable cells compared to the DMSO control sample. Clofazimine (Sigma), an antitubercular antibiotic, is included as a control.

**Isolation of PS757-resistant mutants.** BHI-agar medium was prepared, autoclaved, and cooled to 69°C in a hybridization oven. The cooled BHI-agar was added to a final volume of 30 mL into petri dishes containing PS757-IMD (the imidazole salt of PS757) at final concentrations of 10, 20, and 40  $\mu$ M PS757-IMD. Overnight cultures of *E. faecalis* OG1RF (OD<sub>600</sub> ~3.0) were serially diluted and plated on BHI-agar plates with and without PS757-IMD.

**Genomic sequencing and mutation analysis for PS757-resistant mutants.** Overnight cultures of OG1RF and PS757-resistant isolates HT061, HT062, and HT063 were grown at 37°C in BHI media. The cultures were harvested via centrifugation and the resulting cell pellets were stored at -80°C. Cells pellets were resuspended in 180 µL of lysis buffer (12.5 mM Tris-HCl pH 8.0, 2 mM EDTA, 1.2% Triton X100, and 20 mg/mL lysozyme) and incubated for 60 minutes at 37°C. DNA was extracted using the Qiagen DNeasy Blood & Tissue Kit (Cat. No. 69504) per the manufacturer's instructions. Genomic DNA was sent to MicrobesNG (Birmingham, UK) and sequenced using the standard workflow. Genomic DNA libraries were prepared using the Illumina Nextera XT Library Prep Kit following the manufacturer's protocol with the following modifications: input DNA was increased 2-fold and PCR elongation time was increased to 45 seconds. DNA quantification and library preparation were carried out on a Hamilton Microlab STAR automated liquid handling system. Libraries were sequenced using Illumina HiSeq sequencer using a 250bp paired-end protocol. Sequencing reads were deposited to the NCBI SRA database and can be accessed under BioProject ID PRJNA876221 and Biosample accessions SAMN40648114-117. The resulting paired end reads were compared to the *E. faecalis* OG1RF reference genome (CP002621) using breseq (v0.35.5) (1) with the dependencies bowtie2 (2.2.5) (2) and R (3.6.1) (3). The analysis was performed in Consensus/Mixed Base mode with default parameters.

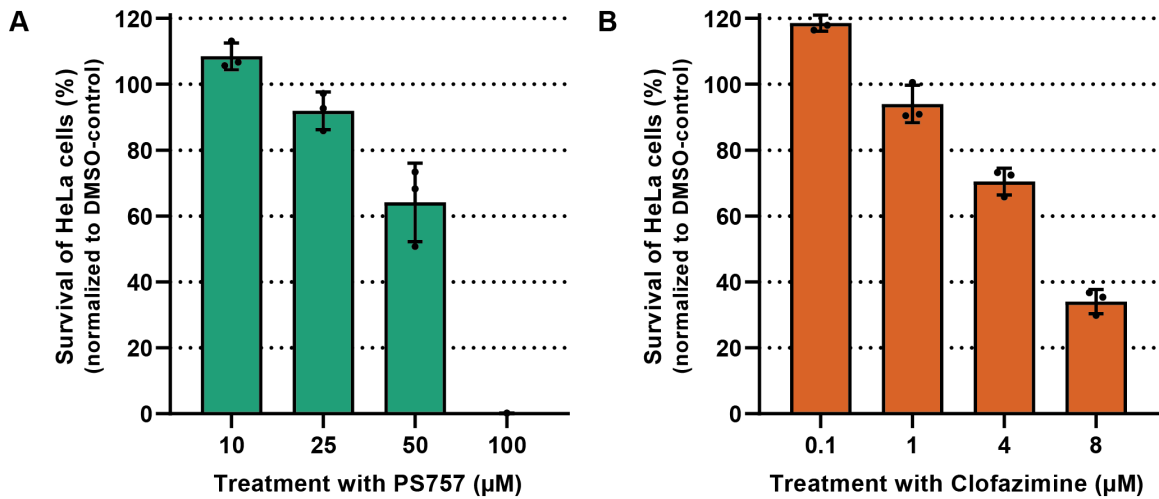

**Fig. S1. HeLa cells show nearly complete survival with treatment of PS757 at concentrations up to 4x MIC of *E. faecalis* OG1RF. (A) Percent survival of HeLa cells treated with indicated concentrations of PS757 relative to the DMSO treated control condition. (B) Percent survival of HeLa cells treated with Clofazimine, an FDA approved antitubercular antibiotic, relative to the DMSO treated control condition. Black bars represent standard deviation of replicates.**

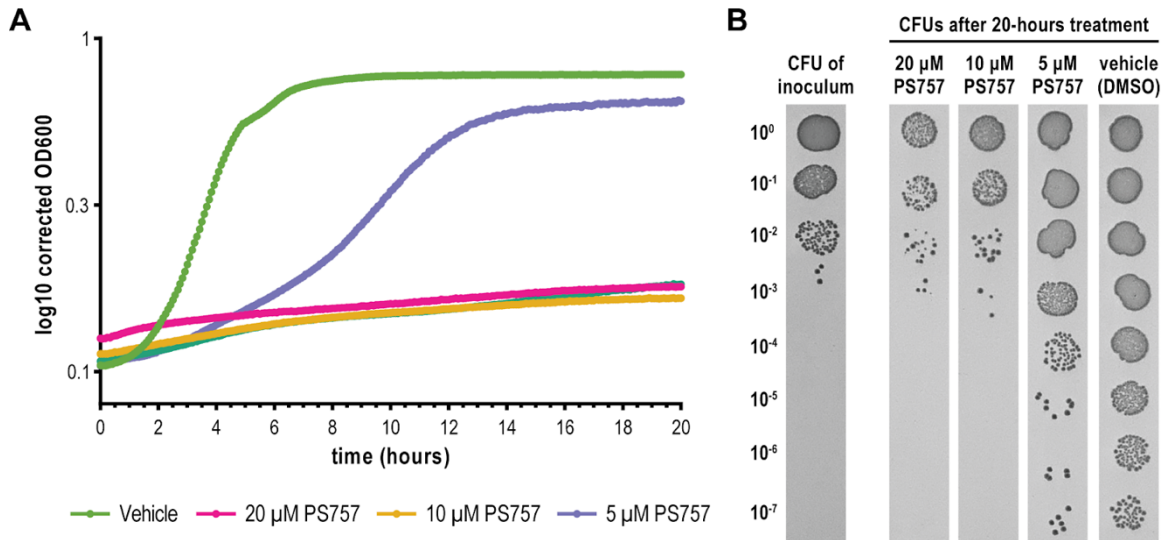

**Fig. S2. PS757 treatment of exponential phase cultures does not result in significantly decreased CFUs over 20 hours.** (A) Growth of exponential phase OG1RF culture in the presence of PS757. Exponential phase cultures of OG1RF were split and then treated with vehicle control (DMSO, green), 5 μM PS757 (purple), 10 μM PS757 (yellow), or 20 μM PS757 (pink) for 20 hours at 37°C. The OD<sub>600</sub> was monitored once in every 1.5 minutes during the 20-hour incubation period. (B) Spot titer assays of OG1RF cells before (initial inoculum, t<sub>0</sub>) and after 20 hours of treatment with 20 μM PS757, 10 μM PS757, 5 μM PS757, and vehicle control (DMSO).

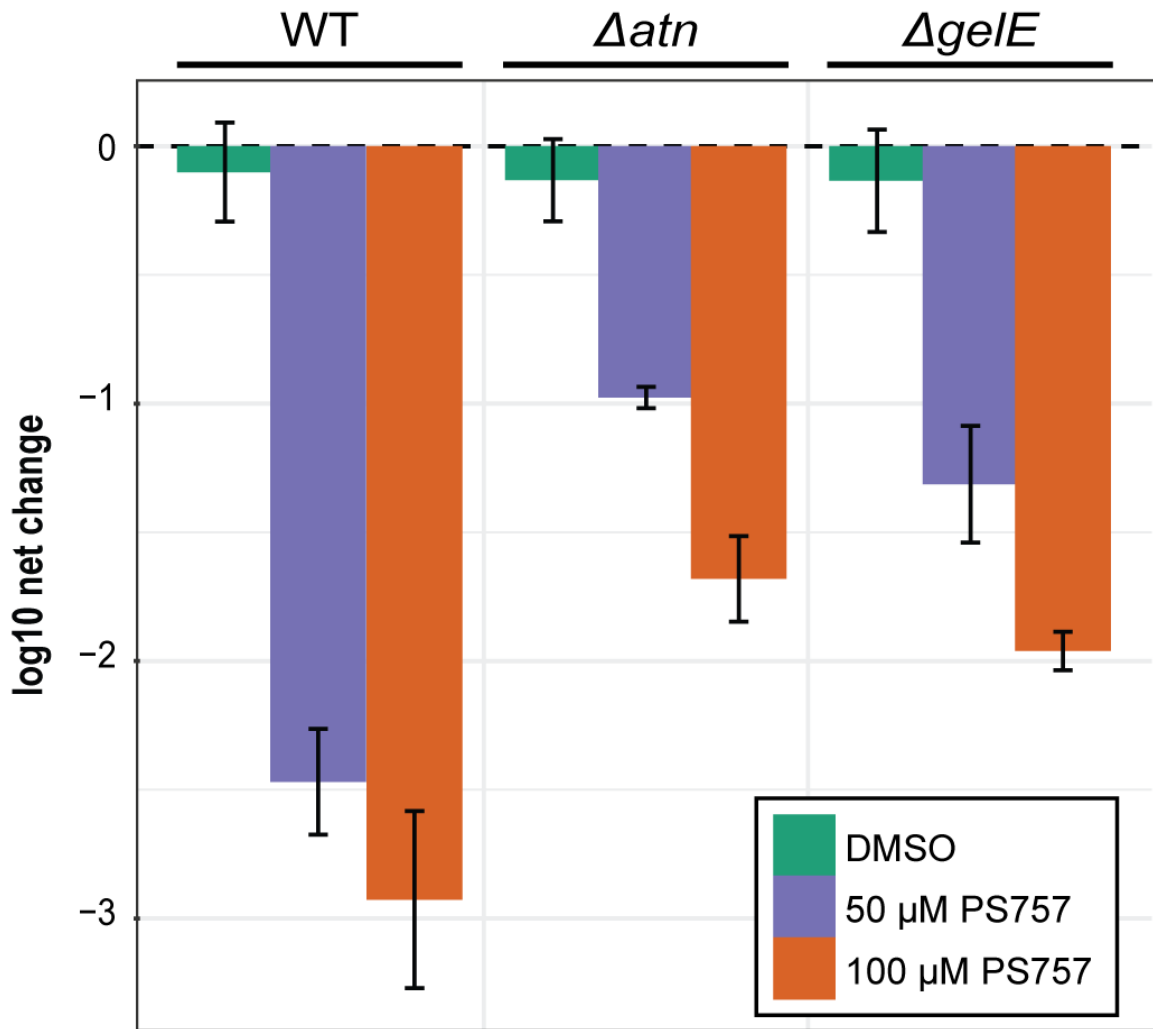

**Fig. S3. PS757-dependent stationary phase cell death is mediated by the Atn autolysin and GeIE protease.** Quantification of CFUs from treated stationary phase cultures of mutant strains. Stationary phase (18 hour) cultures of the indicated strains were treated with the vehicle control DMSO (green), 50 μM PS757 (orange), or 100 μM PS757 (purple) for 20 hours. Net fold change (see materials and methods) is presented as the average change in final CFU/mL relative to the CFU/mL of the untreated initial inoculum. Black bars represent standard deviation of replicates.

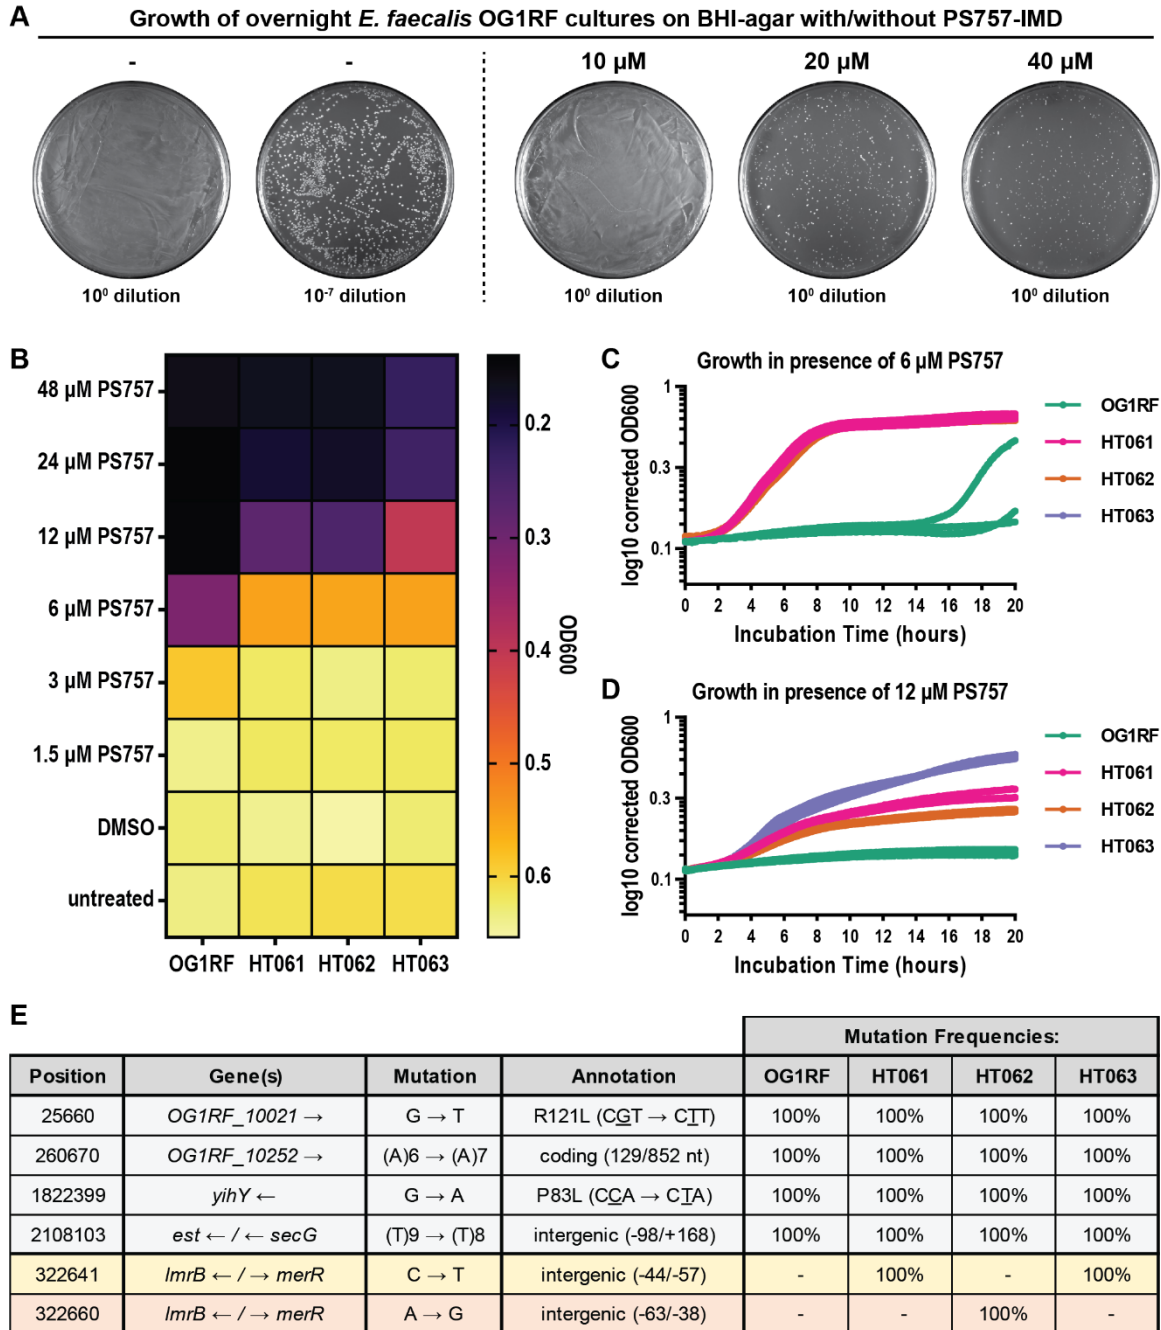

**Fig. S4.** PS757-resistant isolates have mutations in the intergenic region of the gene encoding the LmrB efflux pump. (A) Isolation of PS757-resistant strains. Overnight stationary phase *E. faecalis* OG1RF cultures plated on BHI-agar plates containing the

indicated concentrations of PS757-imidazole salt (PS757-IMD), which improved the solubility of PS757 in the BHI-agar. **(B)** The growth of three strains (HT061-63) isolated on the 40  $\mu$ M PS757-IMD BHI-agar plate was monitored by OD<sub>600</sub> values as indicated after 20 hours in the presence of increasing concentrations of PS757 in liquid BHI media. **(C-D)** Exponential phase cultures of OG1RF and HT061-63 were back-diluted into fresh BHI media and growth was monitored by OD<sub>600</sub> in the presence of 6  $\mu$ M (1x MIC) or 12  $\mu$ M (2x MIC) PS757. **(E)** Genomic mutations with 100% mutation frequency in PS757-resistant isolates HT061-63. Genomic DNA was purified from OG1RF and HT061-63 and sent for whole genome sequencing. The genome sequences of all strains were compared to the OG1RF reference sequence as described in the Supporting Text.



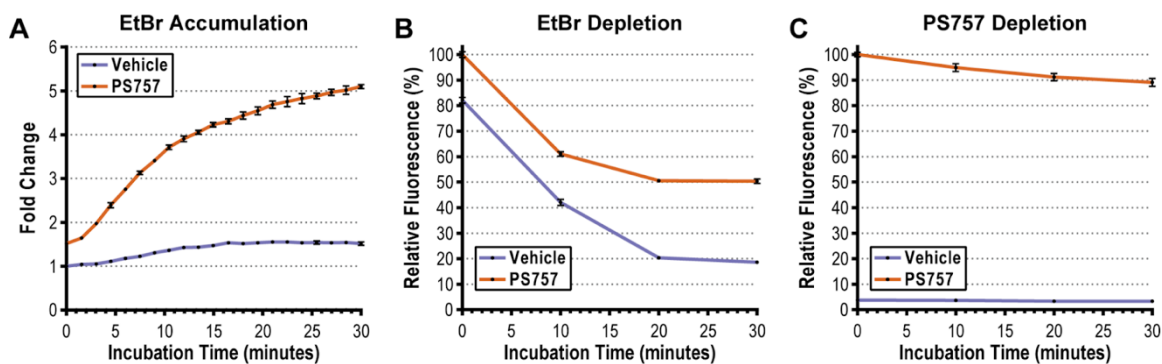

**Fig. S5. Sublethal concentrations of PS757 increase influx and decrease efflux in V583.** (A) EtBr accumulation in V583 cells treated with vehicle (DMSO, blue) or PS757 (orange). EtBr accumulation results are plotted as fold-change of EtBr fluorescence over a 30-minute time course. (B) Relative fluorescence of EtBr depletion of V583 cells pre-treated with EtBr and **i**) vehicle (DMSO, blue); or **ii**) PS757 (orange). (C) Relative fluorescence of PS757 depletion of V583 cells pre-treated with EtBr and **i**) vehicle (DMSO, blue); or **ii**) PS757 (orange). Cells were pre-treated with EtBr (1  $\mu\text{g/ml}$ ), DMSO (0.05%) and/or PS757 (5  $\mu\text{M}$ ). The fluorescence signals emitted from PS757 ( $\lambda_{\text{Ex}}=400$  nm and  $\lambda_{\text{Em}}=440$  nm) and EtBr ( $\lambda_{\text{Ex}}=544$  nm and  $\lambda_{\text{Em}}=590$  nm) were measured with SpectraMax iD3 microplate reader (Molecular Devices). All measurements were performed in four replicates and results were plotted using GraphPad Prism (version 9.3.1). Black bars represent standard deviation of replicates.

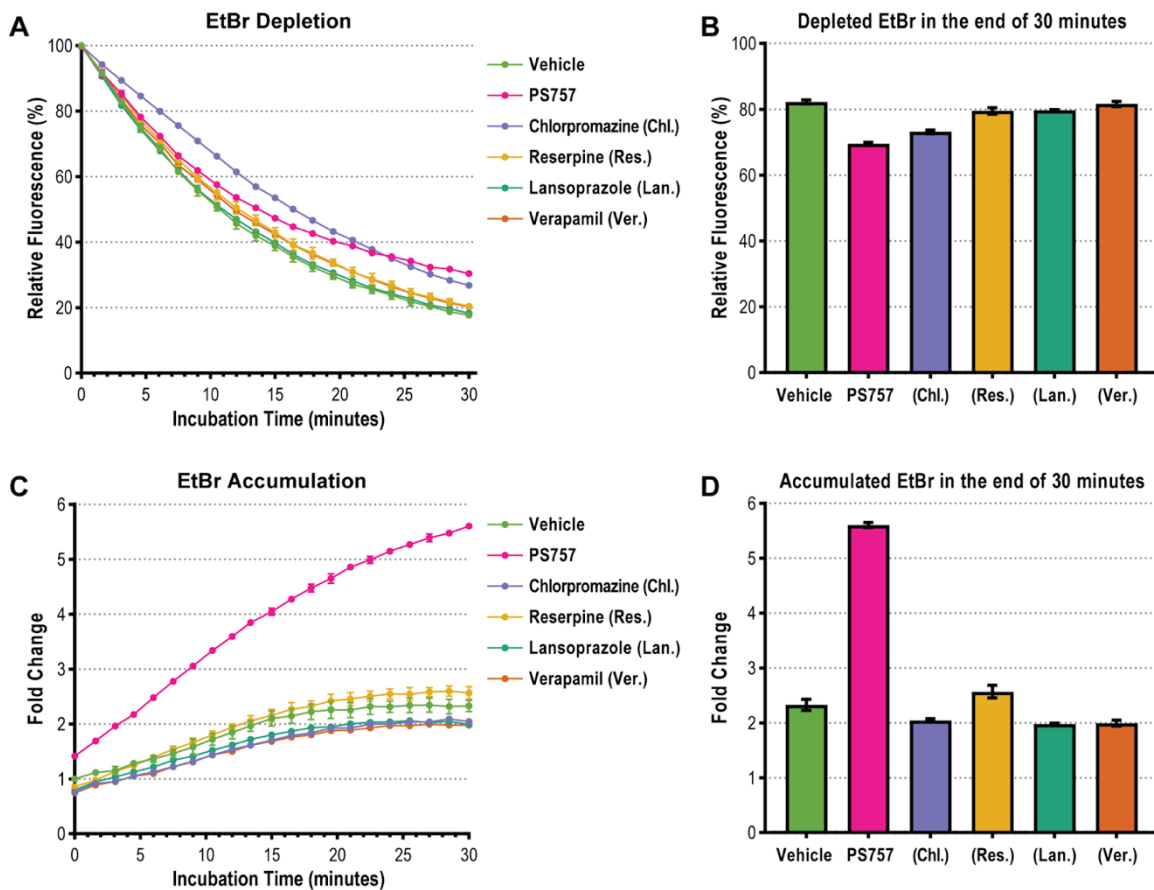

**Fig. S6. EtBr Depletion and Accumulation Assay with OG1RF cells in presence of PS757 or other characterized efflux inhibitors.** (A) Relative fluorescence of EtBr depletion of OG1RF cells treated with vehicle (DMSO, green), PS757 (pink), chlorpromazine-HCl (blue), reserpine (yellow), lansoprazole (cyan), or verapamil-HCl (orange) over a 30-minutes time course. EtBr depletion results are plotted as % relative EtBr fluorescence (relative to the initial fluorescence, 100% at  $t=0$ ) over a 30-minute time course. (B) Quantification of % relative fluorescence after 30 minutes from (A) in OG1RF in the indicated conditions. (C) Fold-change of EtBr accumulation of OG1RF cells treated with vehicle (DMSO, green), PS757 (pink), chlorpromazine-HCl (blue), reserpine (yellow), lansoprazole (cyan), or verapamil-HCl (orange) over a 30-minutes time course. (D) Quantification of fold-change of EtBr fluorescence after 30 minutes from (C) in

OG1RF in the indicated conditions. Cells were pre-treated with EtBr (1  $\mu$ g/ml), DMSO (0.05%), PS757 (5  $\mu$ M) and/or other characterized efflux inhibitors (5  $\mu$ M). The fluorescence signals emitted from EtBr ( $\lambda$ Ex=544 nm and  $\lambda$ Em=590 nm) were measured with SpectraMax iD3 microplate reader (Molecular Devices). All measurements were performed in triplicates and results were plotted using GraphPad Prism (version 9.3.1). Black bars represent standard deviation of replicates.

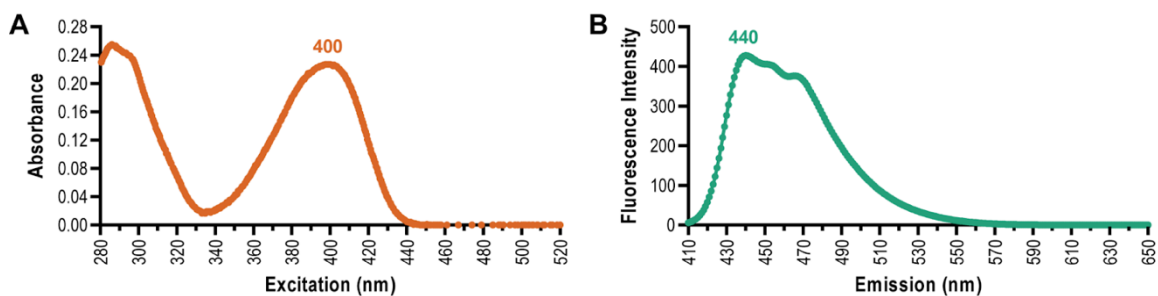

**Fig. S7. Fluorescence properties of PS757.** (A) The absorbance of PS757 (10 μM) dissolved in DMSO (vehicle). The absorption maxima ( $I_{\max}$ ) was determined as 400 nm from the maximum absorbance value against the wavelength. (B) The fluorescence emission of PS757 (10 μM, dissolved in DMSO) upon excitation at 400 nm. The emission maxima ( $I_{\max}$ ) was determined as 440 nm from the maximum emission value against the wavelength.

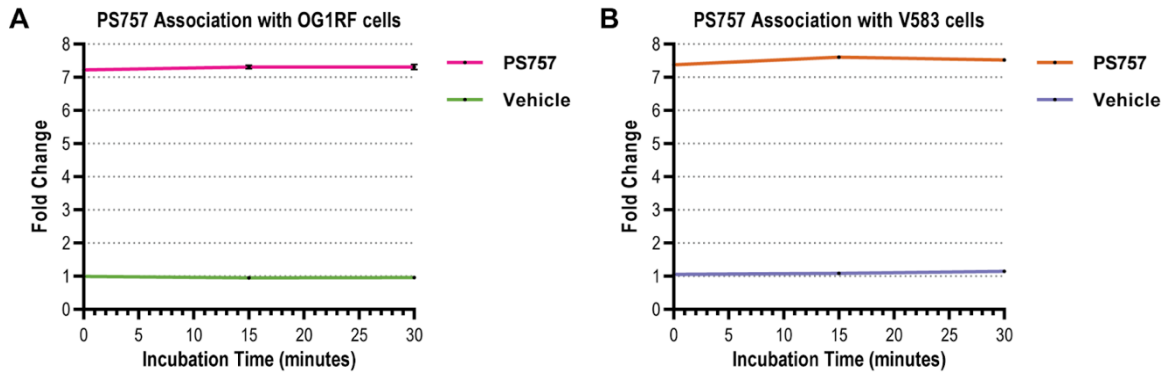

**Fig. S8. PS757 associates rapidly with *E. faecalis* OG1RF and VRE V583 strains.** (A) PS757 association with OG1RF cells treated with 0.01% DMSO (vehicle, green) and 1  $\mu$ M PS757 (pink) over a 30-minute time course. (B) PS757 association with V583 cells treated with 0.01% DMSO (vehicle, purple) and 1  $\mu$ M PS757 (orange) over a 30-minute time course. The fluorescence signals emitted from PS757 ( $\lambda_{Ex}$ =400 nm and  $\lambda_{Em}$ =440 nm) were measured with SpectraMax iD3 microplate reader (Molecular Devices). All measurements were performed in triplicates and results were plotted using GraphPad Prism (version 9.3.1). Black bars represent standard deviation of replicates.

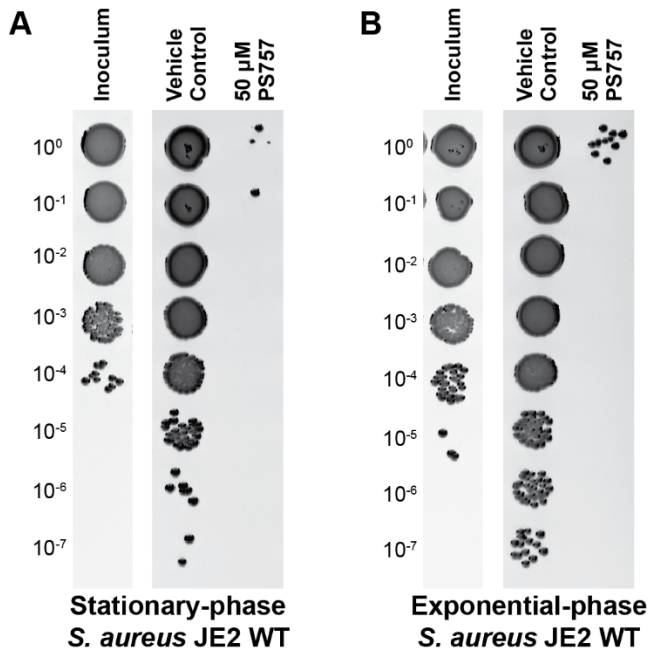

**Fig. S9. PS757 has bactericidal effects against both stationary and exponential phase cultures of *S. aureus*.** Spot plates of stationary (**A**) or exponential (**B**) phase cultures of *S. aureus* JE2 cells treated with either DMSO (vehicle control) or 50  $\mu$ M PS757 for 20 hours. The initial inoculums and treated cultures were 10-fold serially diluted and plated on BHI-agar plates.

**Table S1. Structure and MICs of first generation 2-pyridones**

| Structure                                                                           | Name  | MIC ( $\mu\text{M}$ ) <sup>1</sup> |
|-------------------------------------------------------------------------------------|-------|------------------------------------|
| 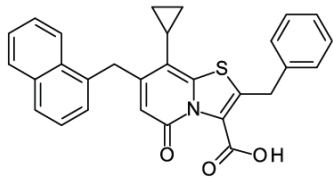   | EC240 | 25                                 |
|    | EC305 | 50                                 |
|   | EC260 | 400                                |
|  | EC312 | 100                                |
|  | FN075 | 200                                |

<sup>1</sup>MICs are determined as described in the Materials and Methods.

**Table S2. List of strains used in this study**

| Species                         | Strain                    | Description                | Resistance        | Reference |
|---------------------------------|---------------------------|----------------------------|-------------------|-----------|
| <i>Enterococcus faecalis</i>    | OG1RF                     | Laboratory strain          | Rif, Fusidic acid | (4)       |
| <i>Enterococcus faecalis</i>    | V583                      | Blood isolate              | Vanc              | (5)       |
| <i>Enterococcus faecalis</i>    | VRE-1320                  | Blood isolate              | Vanc              | (6)       |
| <i>Enterococcus faecalis</i>    | VRE-1321                  | Blood isolate              | Vanc              | (6)       |
| <i>Enterococcus faecalis</i>    | VRE-1322                  | Clinical isolate           | Vanc              | (6)       |
| <i>Enterococcus faecalis</i>    | VRE-1323                  | Blood isolate              | Vanc              | (6)       |
| <i>Enterococcus faecalis</i>    | VRE-1324                  | Blood isolate              | Vanc              | (6)       |
| <i>Enterococcus faecalis</i>    | VRE-1325                  | Blood isolate              | Vanc              | (6)       |
| <i>Enterococcus faecalis</i>    | VRE-1326                  | Blood isolate              | Vanc              | (6)       |
| <i>Enterococcus faecalis</i>    | VRE-1327                  | Blood isolate              | Vanc              | (6)       |
| <i>Enterococcus faecalis</i>    | VRE-1328                  | Blood isolate              | Vanc              | (6)       |
| <i>Enterococcus faecalis</i>    | VRE-1329                  | Blood isolate              | Vanc              | (6)       |
| <i>Enterococcus faecalis</i>    | VRE-1332                  | Gut isolate                | Vanc              | (6)       |
| <i>Enterococcus faecalis</i>    | VRE-1333                  | Gut isolate                | Vanc              | (6)       |
| <i>Enterococcus faecium</i>     | VRE-1379                  | Gut isolate                | Vanc              | (6)       |
| <i>Enterococcus faecium</i>     | VRE-1381                  | Clinical isolate           | Vanc              | (6)       |
| <i>Enterococcus faecalis</i>    | VRE-1386                  | Clinical isolate           | Vanc              | (6)       |
| <i>Enterococcus faecalis</i>    | OG1RF $\Delta atn$        | $\Delta atn$               |                   | (7)       |
| <i>Enterococcus faecalis</i>    | OG1RF $\Delta gelE$       | $\Delta gelE$              |                   | (8)       |
| <i>Enterococcus faecalis</i>    | OG1RF $\Delta sprE$       | $\Delta sprE37-861$        |                   | (8)       |
| <i>Enterococcus faecalis</i>    | OG1RF $\Delta gelE/pgelE$ | $\Delta gelE/pgelE-HA$     | Kan, Cam          | (8)       |
| <i>Enterococcus faecalis</i>    | OG1RF $\Delta sprE/psprE$ | $\Delta sprE/psprE-HA$     | Kan, Cam          | (8)       |
| <i>Enterococcus faecalis</i>    | VRE-1388                  | Clinical isolate           | Vanc              | (6)       |
| <i>Staphylococcus aureus</i>    | MRSA-1369                 | Urine isolate              | Methicillin       | (9)       |
| <i>Streptococcus pyogenes</i>   | HSC5                      | Laboratory strain          |                   | (10)      |
| <i>Streptococcus agalactiae</i> | GCP1418                   | Serotype 3, hyperpigmented |                   | (11)      |
| <i>Streptococcus agalactiae</i> | GCP1419                   | Serotype 5, nonpigmented   |                   | (11)      |
| <i>Streptococcus pneumoniae</i> | JAM158                    | Clinical isolate           |                   | *         |
| <i>Streptococcus pneumoniae</i> | JAM159                    | Clinical isolate           |                   | *         |
| <i>Staphylococcus aureus</i>    | JE2                       | Clinical isolate           |                   | (12)      |
| <i>Bacillus subtilis</i>        | 168                       | Laboratory strain          |                   | (13)      |
| <i>Enterococcus faecalis</i>    | OG1RF                     | HT061                      |                   | This work |
| <i>Enterococcus faecalis</i>    | OG1RF                     | HT062                      |                   | This work |
| <i>Enterococcus faecalis</i>    | OG1RF                     | HT063                      |                   | This work |

\*Gift of Celeste Morley, Dept. Pediatrics, Washington University School of Medicine  
Rif (Rifampin), Vanc (Vancomycin), Kan (Kanamycin), Cam (Chloramphenicol)



**Table S3. Structure and MICs of second generation 2-pyridones**

| Structure                                                                           | Name  | MIC ( $\mu\text{M}$ ) <sup>1</sup> |
|-------------------------------------------------------------------------------------|-------|------------------------------------|
| 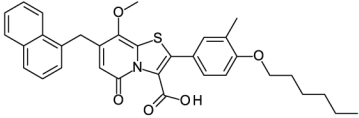   | PS757 | 6                                  |
|    | PS627 | 6                                  |
|    | PS631 | 12                                 |
|    | PS756 | 25                                 |
|    | PS579 | >50                                |
|   | PS624 | 6                                  |
|  | PS581 | 6                                  |
|  | PS625 | 6                                  |
|  | PS749 | >50                                |
|  | PS623 | >50                                |
|  | PS583 | >50                                |

<sup>1</sup>MICs are determined as described in the Materials and Methods.

**Table S4. Checkerboard assay to determine standard-of-care antibiotic interactions with PS757**

| Strain   | PS757 MIC (μM) | PS757 combo MIC (μM) | Antibiotic* | Antibiotic MIC (μg/mL) | Antibiotic combo MIC (μg/mL) | FIC PS757 | FIC Antibiotic | Sum of FIC | Interaction |
|----------|----------------|----------------------|-------------|------------------------|------------------------------|-----------|----------------|------------|-------------|
| OG1RF    | 16             | 1                    | Gent        | 64                     | 8                            | 0.0625    | 0.125          | 0.187      | synergistic |
| V583     | 4              | 2                    | Gent        | 16,384                 | 1,024                        | 0.5       | 0.0625         | 0.562      | additive    |
| VRE-1332 | 4              | 1                    | Gent        | 64                     | 16                           | 0.25      | 0.25           | 0.5        | synergistic |
| VRE-1333 | 4              | 2                    | Gent        | 64                     | 8                            | 0.5       | 0.125          | 0.625      | additive    |
| VRE-1379 | 4              | 1                    | Gent        | 4,069                  | 512                          | 0.25      | 0.125          | 0.375      | synergistic |
| VRE-1381 | 4              | 1                    | Gent        | 16,384                 | 1,024                        | 0.25      | 0.0625         | 0.312      | synergistic |
| VRE-1386 | 1              | 1                    | Gent        | 2,048                  | 256                          | 1         | 0.125          | 1.125      | additive    |
| VRE-1388 | 8              | 4                    | Gent        | 4,096                  | 256                          | 0.5       | 0.0625         | 0.562      | additive    |
| OG1RF    | 4              | 4                    | Vanc        | 4                      | 1                            | 1         | 0.25           | 1.25       | additive    |
| V583     | 4              | 2                    | Vanc        | 32                     | 4                            | 0.5       | 0.125          | 0.625      | additive    |
| VRE-1332 | 4              | 2                    | Vanc        | 4                      | 2                            | 0.5       | 0.5            | 1          | additive    |
| VRE-1333 | 4              | 2                    | Vanc        | 4                      | 2                            | 0.5       | 0.5            | 1          | additive    |
| VRE-1379 | 8              | 4                    | Vanc        | 256                    | 16                           | 0.5       | 0.0625         | 0.56       | additive    |
| VRE-1381 | 4              | 2                    | Vanc        | 2,048                  | 1,024                        | 0.5       | 0.5            | 1          | additive    |
| VRE-1386 | 8              | 2                    | Vanc        | 512                    | 128                          | 0.25      | 0.25           | 0.5        | synergistic |
| VRE-1388 | 8              | 4                    | Vanc        | 512                    | 64                           | 0.5       | 0.125          | 0.625      | additive    |
| OG1RF    | 8              | 4                    | Cipro       | 2                      | 0.25                         | 0.5       | 0.125          | 0.625      | additive    |
| V583     | 16             | 4                    | Cipro       | 0.5                    | 0.125                        | 0.25      | 0.25           | 0.5        | synergistic |
| VRE-1332 | 4              | 2                    | Cipro       | 0.5                    | 0.25                         | 0.5       | 0.5            | 1          | additive    |
| VRE-1333 | 4              | 2                    | Cipro       | 1                      | 0.25                         | 0.5       | 0.25           | 0.75       | additive    |
| VRE-1379 | 4              | 4                    | Cipro       | 256                    | 32                           | 1         | 0.125          | 1.125      | additive    |
| VRE-1381 | 4              | 4                    | Cipro       | 256                    | 32                           | 1         | 0.125          | 1.125      | additive    |
| VRE-1386 | 2              | 1                    | Cipro       | 512                    | 256                          | 0.5       | 0.5            | 1          | additive    |
| VRE-1388 | 4              | 4                    | Cipro       | 256                    | 32                           | 1         | 0.125          | 1.125      | additive    |

\*Gent (Gentamicin), Vanc (vancomycin), Cipro (Ciprofloxacin)

**Table S5. Activity of GmPcide PS757 against Gram-positive bacteria**

| Species                         | Strain    | PS757 MIC ( $\mu$ M) |
|---------------------------------|-----------|----------------------|
| <i>Staphylococcus aureus</i>    | MRSA 1369 | 3.12                 |
| <i>Streptococcus agalactiae</i> | GCP1418   | 3.12                 |
| <i>Streptococcus agalactiae</i> | GCP1419   | 6.25                 |
| <i>Streptococcus pneumoniae</i> | JAM158    | 0.39                 |
| <i>Streptococcus pneumoniae</i> | JAM159    | 0.39                 |
| <i>Streptococcus pyogenes</i>   | HSC5      | 0.78                 |
| <i>Bacillus subtilis</i>        | 168       | 3.12                 |
| <i>Escherichia coli</i>         | UTI89     | >500                 |

\* Structure: PS757, see Fig. 1.

\*\*MICs determined as described in the Materials and Methods

**Dataset S1 (separate file). Chemical synthesis and analytical data for 2-pyridone compounds.**

**SI References**

1. D. E. Deatherage, J. E. Barrick, Identification of mutations in laboratory-evolved microbes from next-generation sequencing data using breseq. *Methods Mol. Biol.* **1151**, 165–188 (2014).
2. B. Langmead, S. L. Salzberg, Fast gapped-read alignment with Bowtie 2. *Nat. Methods* **9**, 357–359 (2012).
3. B. D. Ripley, The R project in statistical computing. *MSOR Connections. The newsletter of the LTSN Maths* (2001).
4. G. M. Dunny, B. L. Brown, D. B. Clewell, Induced cell aggregation and mating in *Streptococcus faecalis*: evidence for a bacterial sex pheromone. *Proc. Natl. Acad. Sci. U. S. A.* **75**, 3479–3483 (1978).
5. D. F. Sahm, *et al.*, In vitro susceptibility studies of vancomycin-resistant *Enterococcus faecalis*. *Antimicrob. Agents Chemother.* **33**, 1588–1591 (1989).
6. A. L. Flores-Mireles, *et al.*, Antibody-Based Therapy for Enterococcal Catheter-Associated Urinary Tract Infections. *MBio* **7** (2016).
7. P. S. Guiton, *et al.*, Contribution of autolysin and Sortase a during *Enterococcus faecalis* DNA-dependent biofilm development. *Infect. Immun.* **77**, 3626–3638 (2009).
8. W. Xu, *et al.*, Host and bacterial proteases influence biofilm formation and virulence in a murine model of enterococcal catheter-associated urinary tract infection. *NPJ Biofilms Microbiomes* **3**, 28 (2017).
9. A. L. Flores-Mireles, *et al.*, Fibrinogen Release and Deposition on Urinary Catheters Placed during Urological Procedures. *J. Urol.* **196**, 416–421 (2016).
10. W. H. Organization, Others, Antimicrobial resistance: Global report on surveillance 2014 (WHO Library Cataloguing-in-Publication Data ISBN: 978 92 4 156474 8) (2014).
11. H. Tettelin, *et al.*, Genome analysis of multiple pathogenic isolates of *Streptococcus agalactiae*: implications for the microbial “pan-genome.” *Proc. Natl. Acad. Sci. U. S. A.* **102**, 13950–13955 (2005).
12. P. D. Fey, *et al.*, A genetic resource for rapid and comprehensive phenotype screening of nonessential *Staphylococcus aureus* genes. *MBio* **4**, e00537–12 (2013).
13. F. Kunst, *et al.*, The complete genome sequence of the gram-positive bacterium *Bacillus subtilis*. *Nature* **390**, 249–256 (1997).
